# Supplementary material
Source: publisher site journal article supplement (https://www.dovepress.com/article/380736)
Supplement: Supplementary file 1 [file get_supplementary_file.php]

**Supplemental File**

**Table S1.** Overview of dry powder inhalers included in the study, the assessment priority for this study and which Peak Inspiratory Flow is required and optimal for effective inhalation.

| **Inhaler type** | **Assessment priority** | **Optimal PIF (L/min)** |
| --- | --- | --- |
| Ellipta© | 1 | 606,7 |
| Turbohaler© | 2 | 606–8 |
| Breezhaler© | 3 | 506,7 |
| Zonda© | 4 | 39* |
| Genuair© | 5 | 456,7 |
| Novolizer© | 6 | 506,7 |
| Spiromax© | 7 | 406,7 |
| Diskus© | 8 | 606–9 |
| Handihaler© | 9 | 306,7 |
| Nexthaler© | 10 | 356,7 |
| Cyclohaler© | 11 | 656 |
| Easyhaler© | 12 | 306,7 |
| Forspiro© | 13 | 606,7 |
| Elpenhaler© | 14 | 60** |
| Clickhaler© | 15 | 1510 |

6Ghosh, S., Pleasants, R. A., Ohar, J. A., Donohue, J. F. & Drummond, M. B. Prevalence and factors associated with suboptimal peak inspiratory flow rates in COPD. Int. J. COPD 14, 585–595 (2019).

7van der Palen, J. Peak inspiratory flow through Diskus and Turbuhaler, measured by means of a peak inspiratory flow meter (In-Check DIAL ®). Respir. Med. (2003) doi:10.1053/rmed.2003.1289.

8Clark, A. R., Weers, J. G. & Dhand, R. The Confusing World of Dry Powder Inhalers: It Is All About Inspiratory Pressures, Not Inspiratory Flow Rates. J. Aerosol Med. Pulm. Drug Deliv. 33, 1–11 (2020).

9Virchow, J. C., Weuthen, T., Harmer, Q. J. & Jones, S. Identifying the features of an easy-to-use and intuitive dry powder inhaler for asthma and chronic obstructive pulmonary disease therapy: Results from a 28-day device handling study, and an airflow resistance study. Expert Opin. Drug Deliv. (2014) doi:10.1517/17425247.2014.949236.

10Newhouse MT, Nantel NP, Chambers CB, Pratt B, Parry-Billings M. Clickhaler (a novel dry powder inhaler) provides similar bronchodilation to pressurized metered-dose inhaler, even at low flow rates. Chest. 115(4), 952–6 (1999).

*Correspondence with the manufacturer TEVA, Nov 18 2020.

**Correspondence with Paul Hagedoorn, Head of Inhalation Research Laboratory, RUG.

**Table S2**. Overview of DPIs included in the PIFotal study and the corresponding checklists for the error ‘breathe in’, stratified by internal device resistance.

| **Inhaler** | **Resistance** | **Description ‘breathe in’ step**  **translated from Netherlands Lung Alliance (LAN) or the Aerosol Drug Management Improvement Team** |
| --- | --- | --- |
| Breezhaler | Low | Inhale calmly, completely with steady moderate force. The inhalation is strong enough when the capsule vibrates during the inhalation. |
| Cyclohaler (Aerolizer) | Low | Inhale calmly, completely with steady moderate force. The inhalation is strong enough when the capsule vibrates during the inhalation. |
| Ellipta | Medium-low | Inhale as deeply as possible with steady, moderate force. |
| Diskus | Medium-low | Inhale as deeply as possible with steady, moderate force. |
| Elpenhaler | Medium-low | Inhale as deeply as possible with steady, moderate force. |
| Turbuhaler – Symbicort | Medium | Breathe in forcefully and deeply. |
| Genuair | Medium | Inhale deeply with powerful force. Within the first second, you will hear a ‘click’. Do not stop inhaling. |
| Novolizer | Medium | Inhale deeply with powerful force. Within the first second, you will hear a ‘click’. Do not stop inhaling. |
| Spiromax | Medium | Inhale as deeply as possible with powerful force. |
| Forspiro | Medium | Inhale as deeply as possible with steady, moderate force. |
| Clickhaler | Medium | Breathe in as briskly, quickly, and deeply as you can until your lungs are full. |
| Nexthaler | Medium-high | Inhale deeply with powerful force. Within the first second, you will hear a ‘click’. Do not stop inhaling. |
| Easyhaler | Medium-high | Inhale as deeply as possible with steady, moderate force. |
| Turbuhaler – Oxis/Pulmicort/Budesonide | Medium-high | Breathe in forcefully and deeply. |
| Zonda | High | Inhale deeply with powerful force. The inhalation is strong enough when you can hear the capsule making a vibrating noise. |
| Handihaler | High | Inhale deeply with powerful force. The inhalation is strong enough when the capsule vibrates (rattles) during the inhalation. |

**Table S3.** Overview of healthcare costs per subcategory outcome parameter.

| COPD-related primary healthcare costs*  Primary care consultation  Primary care consultation, after hours  Other COPD related medical visit (physiotherapist etc.) | € 33  € 50  € 33 |
| --- | --- |
| COPD-related secondary healthcare costs*  Pulmonologist consultation  Pulmonology nurse consultation  Ambulance to the emergency department  Emergency department visit  Hospital admission, 1 night  ICU stay, 1 night | € 91  € 91  € 515  € 259  € 476  € 2015 |
| COPD-related Medication costs**  DPIs (including both priority DPI for study, as other prescribed DPIs)  pMDIs | Differs per inhaler (see Table S4)  Differs per inhaler |
| Total COPD-related healthcare costs | Sum of costs of all healthcare resources used by a patient |

*Unit costs obtained from Zorginstituut Nederland. Inflation correction was used to transfer the provided 2014 costs to 2020 costs (cumulative factor of 6.5%)

**Based on lowest price in The Netherlands. If not available on the Dutch market, prices were looked up in the UK DM+D database or in online pharmacies.

**Table S4.** Overview of medication costs per inhaler.

| **Inhaler type** | **Strength** | **Doses** | **Cost (Euro)** |
| --- | --- | --- | --- |
| Ellipta - Anoro | 55/22 | 30 | 41.49 |
| Ellipta - Incruse | 55 | 30 | 30.13 |
| Ellipta - Relvar | 184/22 | 30 | 36.69 |
| Ellipta - Relvar | 92/22 | 30 | 31.88 |
| Ellipta - Rrelegy | 92/55/22 | 30 | 54.71 |
| Turbuhaler - Oxis | 6 | 60 | 22.21 |
| Turbuhaler - Oxis | 12 | 60 | 19.58 |
| Turbuhaler - Symbicort | 100/6 | 120 | 35.69 |
| Turbuhaler - Symbicort | 200/6 | 120 | 32.14 |
| Turbuhaler - Symbicort | 400/12 | 60 | 28.72 |
| Breezhaler - Onbrez | 150 | 30 | 29.09 |
| Breezhaler - Onbrez | 300 | 30 | 29.09 |
| Breezhaler - Seebri | 44 | 30 | 30.33 |
| Breezhaler - Ultibro | 85/43 | 30 | 41.94 |
| Zonda - Braltus | 16 | 30 | 41.94 |
| Genuair - Duaklir | 340/12 | 60 | 40.23 |
| Genuair - Eklira | 322 | 60 | 40.14 |
| Genuair - Bretaris | 322 | 60 | 32.79 |
| Novolizer - formoterol | 6 | 60 | 23.59 |
| Novolizer - formoterol | 12 | 60 | 21.52 |
| Spiromax - DuoResp | 160/4.5 | 120 | 29.23 |
| Spiromax - DuoResp | 320/9 | 60 | 28.72 |
| Diskus - Seretide | 50/100 | 60 | 21.09 |
| Diskus - Seretide | 50/250 | 60 | 27.35 |
| Diskus - Seretide | 50/500 | 60 | 29.87 |
| Diskus - Serevent | 50 | 60 | 25.67 |
| Handihaler - Spiriva | 18 | 30 | 11.02 |
| Nexthaler - Foster | 100/6 | 120 | 34.06 |
| Nexthaler - Foster | 200/6 | 120 | 36.98 |
| Cyclohaler - formoterol | 12 | 60 | 30.86 |
| Easyhaler - formoterol | 12 | 120 | 43.16 |
| Easyhaler - Salfuler | 160/4.5 | 60 | 37.69 |
| Easyhaler - Bufoler | 160/4.5 | 120 | 96.24 |
| Easyhaler - Bufoler | 320/9 | 60 | 94.47 |
| Forspiro - AirFluSal | 50/500 | 60 | 37.69 |
| Forspiro - AirFluSal | 500/50 | 60 | 37.69 |
| Elpenhaler - Pulmoton (gold) | 400/12 | 60 | 35.66 |
| Elpenhaler - Rolenium (gold) | 50/250 | 60 | 35.66 |
| Elpenhaler - Rolenium (gold) | 50/500 | 60 | 35.66 |
| Elpenhaler - Pulmoton (new) | 400/12 | 60 | 35.66 |
| Elpenhaler - Rolenium (new) | 50/250 | 60 | 35.66 |
| Elpenhaler - Rolenium (new) | 50/500 | 60 | 35.66 |
| Clickhaler - formoterol | 12 | 60 | 15.15 |
| Turbuhaler – Bricanyl*  (4 doses per day / equating to average patient use) | 250 | 120 | 7.54 |
| Turbuhaler - Pulmicort | 200 | 200 | 23.39 |
| Turbuhaler - Pulmicort | 400 | 200 | 48.58 |
| Diskus - Flixotide | 100 | 60 | 9.12 |
| Diskus - Flixotide | 250 | 60 | 18.79 |
| Diskus - Flixotide | 500 | 60 | 32.41 |
| Diskus – Ventolin*  (2 doses per day / equating to average patient use) | 200 | 60 | 3.83 |

*Short-Acting Beta Agonists, medication costs were calculated based on average daily use in the PIFotal study.31

**Table S5**. Overview of confounder candidates for the different associations. The confounder candidates were equal to the confounder candidates reported in the primary results paper of the PIFotal COPD study.11

| **All models:** |  |  |
| --- | --- | --- |
| Country of residence | Australia, n (%)  Spain, n (%)  Greece, n (5)  The Netherlands, n (%)  Poland, n (%)  Portugal, n (%) | 19 (1.3)  432 (30.1)  196 (13.7)  468 (32.6)  113 (7.9)  206 (14.4) |
| Age | Mean (SD) | 69.2 (9.3) |
| Sex | Female, n (%)  Male, n (%) | 718 (50.1)  716 (49.9) |
| Body Mass Index | Mean (SD) | 27.8 (5.3) |
| Smoking status | Current, n (%)  Former, n (%)  Never, n (%) | 436 (30.4)  824 (57.5)  174 (12.1) |
| Educational level | Primary, n (%)  Secondary, n (%)  Post-secondary vocational, n (%)  University, n (%) | 436 (30.4)  301 (21.0)  368 (25.7)  327 (22.8) |
| Medication class in inhaler (according to assessment priority scheme) | LABA, n (%)  LAMA, n (%)  LABA/LAMA, n (%)  LABA/LAMA/ICS, n (%)  ICS, n (%)  ICS/LABA, n (%)  Short-acting, n (%) | 112 (7.8)  385 (26.8)  357 (24.9)  63 (4.4)  9 (0.6)  506 (35.3)  2 (0.1) |
| Overall COPD medication regimen | Triple Therapy, n (%)  ICS + (LAMA or LABA), n (%)  LAMA+LABA, n (%)  LAMA or LABA or ICS mono, n (%) | 331 (23.1)  419 (29.2)  359 (25.0)  325 (22.7) |
| SARS-COV-2 history | Negative, n (%)  Positive - Managed at home, n (%)  Positive - Managed at hospital, n (%) | 1353 (95.1)  56 (3.9)  13 (0.9) |
| Lung comorbidity | n, (%) | 122 (8.5) |
| Cardiovascular comorbidity | n, (%) | 642 (45.0) |
| Depression | n, (%) | 288 (20.2) |
| Anxiety | n, (%) | 344 (24.1) |
| Diabetes mellitus | n, (%) | 295 (20.7) |
| **Specific for predictor *Suboptimal PIF*:**   - Non-adherence - All inhalation errors (except error related to PIF: ’Breathing in incorrect’) | | |
| **Specific for predictor *Non-adherence*:**   - All inhalation errors (except the critical errors that are included in the definition: *Teeth and lips sealed around mouthpiece, breathe in,* and *breathe out calmly after inhalation*) | | |
|  | | |

**Table S6.** Overview of confounders included in the models with all patients.

| Outcome | Predictor | Identified confounders |
| --- | --- | --- |
| Total costs  (all patients) | Suboptimal PIF | Medication regimen |
| Non-adherence | **-** |
| Preparation | **-** |
| Remove protective cap | **-** |
| Sit up/stand straight & tilt head | **-** |
| Hold inhaler in corrrect position during preparation | Medication class |
| Hold inhaler in correct position during inhalation | Device resistance |
| Breathe out completely before inhalation | **-** |
| Teeth and lips sealed around mouthpiece | Medication regimen |
| Breathe in | **-** |
| Hold breath | **-** |
| Breathe out calmly after inhalation | Medication regimen |
| Cannot do | Medication regimen |
| Can, but will not do | Medication regimen |
| Primary healthcare costs  (all patients) | Suboptimal PIF | Country of residence; Medication class |
| Non-adherence | Country of residence |
| Preparation | Cardiovascular comorbidity; Educational level; Device resistance |
| Remove protective cap | Anxiety; Cardiovascular comorbidity; Country of residence; Smoking status |
| Sit up/stand straight & tilt head | Country of residence |
| Hold inhaler in corrrect position during preparation | Medication class; Medication regimen |
| Hold inhaler in correct position during inhalation | Country of residence; Medication class; SARCOV2; Medication regimen |
| Breathe out completely before inhalation | **-** |
| Teeth and lips sealed around mouthpiece | Anxiety; Cardiovascular comorbidity; Country of residence; Medication class; Device resistance; Medication regimen |
| Breathe in | Country of residence |
| Hold breath | Country of residence |
| Breathe out calmly after inhalation | SARCOV2; Medication regimen |
| Cannot do | Anxiety; Country of residence; Medication class; Smoking status; Medication regimen |
| Can, but will not do | Anxiety; Country of residence; Medication class; Smoking status; Medication regimen |
| Secondary healthcare costs  (all patients) | Suboptimal PIF | Country of residence; Error: Preparation; Error: Breathing out after inhalation; Smoking status |
| Non-adherence | Anxiety; Cardiovascular comorbidity; Country of residence; Error: Holding breath; Medication class; Smoking status |
| Preparation | Anxiety; Cardiovascular comorbidity; Country of residence; Diabetes; Lung comorbidity; Medication class; Device resistance; SARCOV2; Medication regimen |
| Remove protective cap | Age; Anxiety; Cardiovascular comorbidity; Country of residence; Diabetes; Sex; Lung comorbidity; Medication class; Device resistance |
| Sit up/stand straight & tilt head | Cardiovascular comorbidity; Country of residence; Medication class; Device resistance |
| Hold inhaler in corrrect position during preparation | Cardiovascular comorbidity; Diabetes; Medication class; Medication regimen |
| Hold inhaler in correct position during inhalation | Anxiety; Cardiovascular comorbidity; Country of residence; Device resistance |
| Breathe out completely before inhalation | Anxiety; Country of residence; Diabetes; Device resistance |
| Teeth and lips sealed around mouthpiece | Anxiety; Cardiovascular comorbidity; Country of residence; Educational level; Lung comorbidity; Medication class |
| Breathe in | Country of residence; Diabetes; Medication class; Device resistance; Smoking status; |
| Hold breath | Anxiety; Cardiovascular comorbidity; Country of residence; Medication class |
| Breathe out calmly after inhalation | Anxiety; Country of residence; Educational level; Lung comorbidity; Device resistance; Medication regimen |
| Cannot do | Anxiety; Cardiovascular comorbidity; Diabetes; Medication class; Device resistance; Smoking status; Medication regimen |
| Can, but will not do | Anxiety; Cardiovascular comorbidity; Diabetes; Medication class; Device resistance; Smoking status; Medication regimen |
| Medication costs  (all patients) | Suboptimal PIF | **-** |
| Non-adherence | **-** |
| Preparation | **-** |
| Remove protective cap | **-** |
| Sit up/stand straight & tilt head | **-** |
| Hold inhaler in corrrect position during preparation | Medication class |
| Hold inhaler in correct position during inhalation | **-** |
| Breathe out completely before inhalation | **-** |
| Teeth and lips sealed around mouthpiece | Medication class; Medication regimen |
| Breathe in | **-** |
| Hold breath | **-** |
| Breathe out calmly after inhalation | - |
| Cannot do | Medication regimen |
| Can, but will not do | Medication regimen |

**Table S7.** Medication used for COPD by study participants, stratified by sufficiency of Peak Inspiratory Flow (optimal/suboptimal).

| **Variable** |  | **PIFR optimal (n=987)** | **PIFR suboptimal (n=402)** | **Total (n=1,434)** | **p*** |
| --- | --- | --- | --- | --- | --- |
| **SA DPI** | **n (%)** | 50 (5.1) | 19 (4.7) | 69 (4.8) | 0.79 |
| **SA pMDI** | **n (%)** | 158 (16.0) | 102 (25.4) | 270 (18.8) | **<0.01** |
| **LAMA DPI** | **n (%)** | 320 (32.4) | 146 (36.3) | 474 (33.1) | 0.16 |
| **LAMA pMDI** | **n (%)** | 21 (2.1) | 16 (4.0) | 38 (2.6) | 0.052 |
| **LABA DPI** | **n (%)** | 94 (9.5) | 33 (8.2) | 130 (9.1) | 0.44 |
| **LABA pMDI** | **n (%)** | 4 (0.4) | 4 (1.0) | 8 (0.6) | 0.19 |
| **LAMA/LABA DPI** | **n (%)** | 276 (28.0) | 71 (17.7) | 364 (25.4) | **<0.01** |
| **LAMA/LABA pMDI** | **n (%)** | 4 (0.4) | 2 (0.5) | 6 (0.4) | 0.81 |
| **ICS DPI** | **n (%)** | 33 (3.3) | 13 (3.2) | 48 (3.3) | 0.92 |
| **ICS pMDI** | **n (%)** | 19 (1.9) | 4 (1.0) | 23 (1.6) | 0.22 |
| **LABA/ICS DPI** | **n (%)** | 382 (38.7) | 178 (44.3) | 573 (40.0) | 0.055 |
| **LABA/ICS pMDI** | **n (%)** | 34 (3.4) | 25 (6.2) | 62 (4.3) | **0.02** |
| **LAMA/LABA/ICS DPI** | **n (%)** | 31 (3.1) | 26 (6.5) | 63 (4.4) | **<0.01** |

*p = p-value for the Kruskal-Wallis equality-of-populations rank test, or the Pearson's chi-square test of independent categories, where appropriate; p-values < 0.05 are highlighted in **bold;** SA=short-acting, LAMA= long-acting muscarinic antagonist, LABA= long-acting beta-agonist, ICS= inhaled corticosteroid, DPI= dry-powder inhaler, pMDI=pressurized metered-dose inhaler.

**Table S8.** Average healthcare costs (6-months period), stratified by sufficiency of Peak Inspiratory Flow (optimal/suboptimal).

| **Variable (Mean SD)** |  | **PIFR optimal (n=987)** | **PIFR suboptimal (n=402)** | **Total (n=1,434)** | **p*** |
| --- | --- | --- | --- | --- | --- |

| Costs of DPI used for study *(priority list Table S1)* | 412.5 (205.7) | 413.1 (202.7) | 414.6 (203.2) | 0.73 |
| --- | --- | --- | --- | --- |
| Costs of other DPIs | 47.9 (125.5) | 53.0 (132.3) | 48.9 (127.1) | 0.43 |
| pMDI costs | 63.7 (212.6) | 94.4 (219.1) | 72.0 (212.5) | **<0.01** |
| Inhaled medication, total costs | 524.1 (310.9) | 560.4 (311.9) | 535.5 (308.1) | **0.03** |
| GP consultations, costs | 24.3 (63.5) | 32.5 (73.6) | 26.2 (66.0) | **0.01** |
| GP consultations, after hours, costs | 7.1 (47.1) | 5.2 (33.8) | 6.4 (43.1) | 0.72 |
| Other medical consultations, costs | 86.1 (320.8) | 85.0 (343.2) | 84.8 (322.5) | 0.63 |
| Ambulance to ED, costs | 11.1 (110.0) | 21.8 (153.5) | 13.8 (122.2) | 0.145 |
| Emergency department visits, costs | 20.7 (121.3) | 37.1 (204.8) | 25.0 (148.7) | 0.18 |
| Hospital nights, costs | 63.7 (726.8) | 249.8 (3078.6) | 113.9 (1738.7) | **0.06** |
| ICU nights, costs | 0.0 (0.0) | 0.0 (0.0) | 0.0 (0.0) | 1.00 |
| Pulmonary nurse consultations, costs | 16.7 (260.4) | 22.2 (245.9) | 17.7 (252.2) | 0.99 |
| Pulmonologist consultations, costs | 67.8 (190.8) | 79.1 (189.1) | 71.0 (189.0) | **0.02** |
| COPD-related primary healthcare costs | 125.1 (359.3) | 130.8 (387.3) | 125.2 (362.2) | 0.405 |
| COPD-related secondary healthcare, costs | 180.0 (956.5) | 410.1 (3297.2) | 241.4 (1919.4) | **0.02** |
| COPD-related total costs | 829.3 (1133.7) | 1101.3 (3380.6) | 902.1 (2025.2) | **0.03** |

*p = p-value for the Kruskal-Wallis equality-of-populations rank test, or the Pearson's chi-square test of independent categories, where appropriate; p-values < 0.05 are highlighted in **bold;** DPI = dry powder inhaler; pMDI = pressurised metered dose inhaler; GP = General Practitioner; ED = Emergency department; ICU = Intensive Care Unit; COPD = Chronic Obstructive Pulmonary Disease.
